# Supplementary material
Source: MDPI journal article supplement (https://www.mdpi.com/2311-5637/10/3/146)
Supplement: s1 [file s1]

**Supplementary Information**

**Efficient secretory expression of leghemoglobin in *Saccharomyces cerevisiae***

Yiyun Huang<sup>1,2,3,4</sup>, Jingwen Zhou<sup>1,2,3,4</sup>, Jianghua Li<sup>1,2,3,4</sup>, Guocheng Du<sup>1,2,3,4,5</sup>, Jian Chen<sup>1,2,3,4</sup>, Xinrui Zhao<sup>1,2,3,4\*</sup>

<sup>1</sup> Key Laboratory of Industrial Biotechnology, Ministry of Education, School of Biotechnology, Jiangnan University, 1800 Lihu Road, Wuxi, Jiangsu 214122, China;

<sup>2</sup> Science Center for Future Foods, Jiangnan University, 1800 Lihu Road, Wuxi, Jiangsu 214122, China;

<sup>3</sup> Jiangsu Province Engineering Research Center of Food Synthetic Biotechnology, Jiangnan University, 1800 Lihu Road, Wuxi, Jiangsu 214122, China;

<sup>4</sup> Engineering Research Center of Ministry of Education on Food Synthetic Biotechnology, Jiangnan University, 1800 Lihu Road, Wuxi, Jiangsu 214122, China;

<sup>5</sup> Key Laboratory of Carbohydrate Chemistry and Biotechnology, Ministry of Education, Jiangnan University, 1800 Lihu Road, Wuxi, Jiangsu 214122, China;

\* Correspondence: zhaoxinrui@jiangnan.edu.cn

Mailing address: School of Biotechnology, Jiangnan University, 1800 Lihu Road, Wuxi, Jiangsu 214122, China.

20 **Supplementary Figures 1-3**

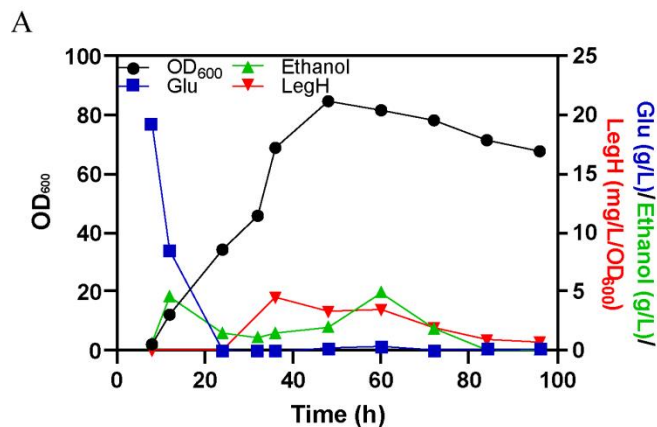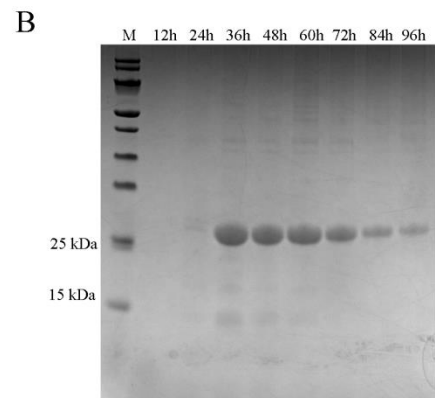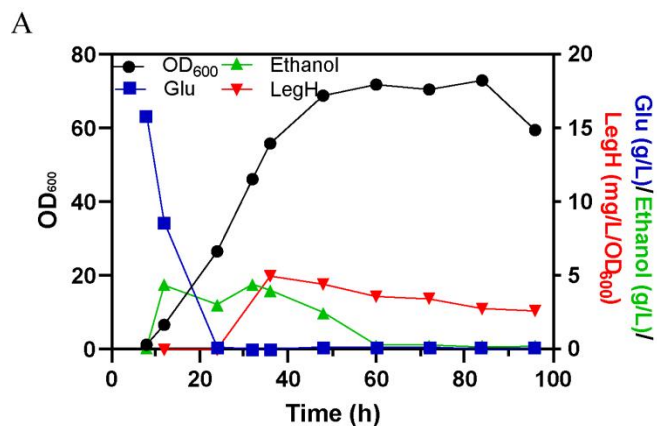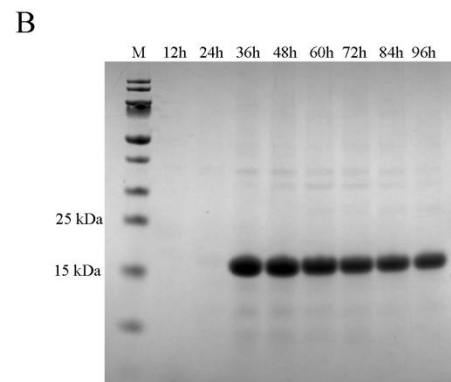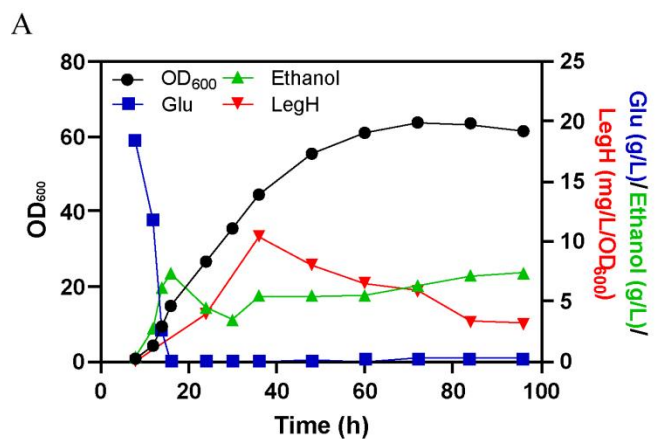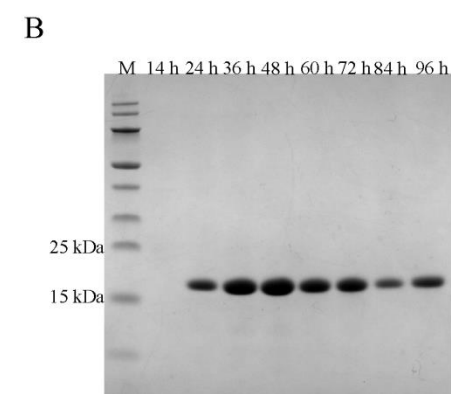

35 **Figure S3** The exponential feeding strategy used for fed-batch fermentation at 5-L

31 fermenter level (S4 strain)

32 **Supplementary Tables 1-4**33 **Table S1 Strains and plasmids used in this study**

| Strains and plasmids                            | Description                                                                                                                                                                                    | Source     |
|-------------------------------------------------|------------------------------------------------------------------------------------------------------------------------------------------------------------------------------------------------|------------|
| <b>Strains</b>                                  |                                                                                                                                                                                                |            |
|                                                 | <i>E. coli</i> str. K-12 F <sup>-</sup> <i>endA1 glnV44 thi-1</i>                                                                                                                              |            |
| DH5α                                            | <i>recA1 relA1 gyrA96 deoR nupG</i><br><i>purB20 φ80dlacZΔM15 Δ</i><br>( <i>lacZYA-argF</i> ) U169 <i>hsdR17</i> ( <i>r<sub>K</sub><sup>-</sup> m<sub>K</sub><sup>+</sup></i> ) λ <sup>-</sup> | Lab stock  |
| CEN.PK2-1C                                      | MATα, <i>ura3-52</i> , <i>trp1-289</i> , <i>leu2-3,112</i> ,<br><i>his3Δ1</i> , <i>MAL2-8C</i> , <i>SUC2</i>                                                                                   | Lab stock  |
| GAL1-LegH (S4)                                  | CEN.PK2-1C harboring plasmid<br>pESC-P <sub>GAL1</sub> -LegH                                                                                                                                   | Lab stock  |
| CRM <sub>GAL1</sub> -CORE <sub>TEF1</sub> -LegH | CEN.PK2-1C harboring plasmid<br>pESC-CRM <sub>GAL1</sub> -CORE <sub>TEF1</sub> -LegH                                                                                                           | This study |
| CRM <sub>GAL1</sub> -CORE <sub>TDH3</sub> -LegH | CEN.PK2-1C harboring plasmid<br>pESC-CRM <sub>GAL1</sub> -CORE <sub>TDH3</sub> -LegH                                                                                                           | This study |
| CRM <sub>GAL1</sub> -CORE <sub>GAL7</sub> -LegH | CEN.PK2-1C harboring plasmid<br>pESC-CRM <sub>GAL1</sub> -CORE <sub>GAL7</sub> -LegH                                                                                                           | This study |
| GAL1-UAS×2/×3/×4-LegH                           | GAL1 harboring with<br>pESC-P <sub>GAL1</sub> -UAS×2/×3/×4-LegH                                                                                                                                | This study |
| Δ <i>GAL80</i>                                  | CEN.PK2-1C derived strain, Δ <i>GAL80</i>                                                                                                                                                      | This study |
| Δ <i>GAL80</i> -Δ <i>MCA1</i>                   | CEN.PK2-1C derived strain, Δ <i>GAL80</i><br>Δ <i>MCA1</i>                                                                                                                                     | This study |
| Δ <i>GAL80</i> -Δ <i>PEP4</i>                   | CEN.PK2-1C derived strain, Δ <i>GAL80</i><br>Δ <i>PEP4</i>                                                                                                                                     | This study |
| Δ <i>GAL80</i> -Δ <i>VPS10</i>                  | CEN.PK2-1C derived strain, Δ <i>GAL80</i><br>Δ <i>VPS10</i>                                                                                                                                    | This study |
| Δ <i>GAL80</i> -Δ <i>PEP4</i> -Δ <i>VPS10</i>   | CEN.PK2-1C derived strain, Δ <i>GAL80</i><br>Δ <i>PEP4</i> Δ <i>VPS10</i>                                                                                                                      | This study |

| Strains and plasmids                      | Description                                                                                      | Source     |
|-------------------------------------------|--------------------------------------------------------------------------------------------------|------------|
| GAL1-LegH- $\Delta GAL80$                 | $\Delta GAL80$ harboring plasmid<br>pESC-P <sub>GAL1</sub> -LegH                                 | This study |
| MF $\alpha$ - $\Delta GAL80$              | $\Delta GAL80$ harboring plasmid<br>pESC-P <sub>GAL1</sub> -MF $\alpha$ -LegH                    | This study |
| $\alpha(\Delta 27-29)$ - $\Delta GAL80$   | $\Delta GAL80$ harboring plasmid<br>pESC-P <sub>GAL1</sub> -MF $\alpha_{\Delta 27-29}$ -LegH     | This study |
| $\alpha(\Delta 30-43)$ - $\Delta GAL80$   | $\Delta GAL80$ harboring plasmid<br>pESC-P <sub>GAL1</sub> -MF $\alpha_{\Delta 30-43}$ -LegH     | This study |
| $\alpha(\Delta 44-70)$ - $\Delta GAL80$   | $\Delta GAL80$ harboring plasmid<br>pESC-P <sub>GAL1</sub> -MF $\alpha_{\Delta 44-70}$ -LegH     | This study |
| $\alpha(\Delta 55-70)$ - $\Delta GAL80$   | $\Delta GAL80$ harboring plasmid<br>pESC-P <sub>GAL1</sub> -MF $\alpha_{\Delta 55-70}$ -LegH     | This study |
| $\alpha(\Delta 57-60)$ - $\Delta GAL80$   | $\Delta GAL80$ harboring plasmid<br>pESC-P <sub>GAL1</sub> -MF $\alpha_{\Delta 57-60}$ -LegH     | This study |
| $\alpha(\Delta 57-70)$ - $\Delta GAL80$   | $\Delta GAL80$ harboring plasmid<br>pESC-P <sub>GAL1</sub> -MF $\alpha_{\Delta 57-70}$ -LegH     | This study |
| $\alpha(\Delta 79-83)$ - $\Delta GAL80$   | $\Delta GAL80$ harboring plasmid<br>pESC-P <sub>GAL1</sub> -MF $\alpha_{\Delta 79-83}$ -LegH     | This study |
| $\alpha(1 \times 57-60)$ - $\Delta GAL80$ | $\Delta GAL80$ harboring plasmid<br>pESC-P <sub>GAL1</sub> -MF $\alpha_{(57-60) \times 1}$ -LegH | This study |
| Ost1( $\Delta 27-29$ )- $\Delta GAL80$    | $\Delta GAL80$ harboring plasmid<br>pESC-P <sub>GAL1</sub> -OF $\alpha_{\Delta 27-29}$ -LegH     | This study |
| Ost1( $\Delta 30-43$ )- $\Delta GAL80$    | $\Delta GAL80$ harboring plasmid<br>pESC-P <sub>GAL1</sub> -OF $\alpha_{\Delta 30-43}$ -LegH     | This study |
| Ost1( $\Delta 44-70$ )- $\Delta GAL80$    | $\Delta GAL80$ harboring plasmid<br>pESC-P <sub>GAL1</sub> -OF $\alpha_{\Delta 44-70}$ -LegH     | This study |
| Ost1( $\Delta 55-70$ )- $\Delta GAL80$    | $\Delta GAL80$ harboring plasmid<br>pESC-P <sub>GAL1</sub> -OF $\alpha_{\Delta 55-70}$ -LegH     | This study |

| Strains and plasmids                   | Description                                                                                     | Source     |
|----------------------------------------|-------------------------------------------------------------------------------------------------|------------|
| Ost1( $\Delta$ 57-60)- $\Delta$ GAL80  | $\Delta$ GAL80 harboring plasmid<br>pESC-P <sub>GAL1</sub> -OF $\alpha_{\Delta$ 57-60-LegH      | This study |
| Ost1( $\Delta$ 57-70)- $\Delta$ GAL80  | $\Delta$ GAL80 harboring plasmid<br>pESC-P <sub>GAL1</sub> -OF $\alpha_{\Delta$ 57-70-LegH      | This study |
| Ost1( $\Delta$ 79-83)- $\Delta$ GAL80  | $\Delta$ GAL80 harboring plasmid<br>pESC-P <sub>GAL1</sub> -OF $\alpha_{\Delta$ 79-83-LegH      | This study |
| Ost1(1 $\times$ 57-60)- $\Delta$ GAL80 | $\Delta$ GAL80 harboring plasmid<br>pESC-P <sub>GAL1</sub> -OF $\alpha_{(57-60)\times 1}$ -LegH | This study |
| MF $\alpha^{V38A}$ - $\Delta$ GAL80    | $\Delta$ GAL80 harboring plasmid<br>pESC-P <sub>GAL1</sub> -MF $\alpha^{V38A}$ -LegH            | This study |
| MF $\alpha^{G40D}$ - $\Delta$ GAL80    | $\Delta$ GAL80 harboring plasmid<br>pESC-P <sub>GAL1</sub> -MF $\alpha^{G40D}$ -LegH            | This study |
| MF $\alpha^{V50A}$ - $\Delta$ GAL80    | $\Delta$ GAL80 harboring plasmid<br>pESC-P <sub>GAL1</sub> -MF $\alpha^{V50A}$ -LegH            | This study |
| MF $\alpha^{L63S}$ - $\Delta$ GAL80    | $\Delta$ GAL80 harboring plasmid<br>pESC-P <sub>GAL1</sub> -MF $\alpha^{L63S}$ -LegH            | This study |
| MF $\alpha^{L64S}$ - $\Delta$ GAL80    | $\Delta$ GAL80 harboring plasmid<br>pESC-P <sub>GAL1</sub> -MF $\alpha^{L64S}$ -LegH            | This study |
| MF $\alpha^{F65S}$ - $\Delta$ GAL80    | $\Delta$ GAL80 harboring plasmid<br>pESC-P <sub>GAL1</sub> -MF $\alpha^{F65S}$ -LegH            | This study |
| MF $\alpha^{I66T}$ - $\Delta$ GAL80    | $\Delta$ GAL80 harboring plasmid<br>pESC-P <sub>GAL1</sub> -MF $\alpha^{I66T}$ -LegH            | This study |
| PIR3- $\Delta$ GAL80                   | $\Delta$ GAL80 harboring plasmid<br>pESC-P <sub>GAL1</sub> -PIR3-LegH                           | This study |
| NCW2- $\Delta$ GAL80                   | $\Delta$ GAL80 harboring plasmid<br>pESC-P <sub>GAL1</sub> -NCW2-LegH                           | This study |
| PSG1- $\Delta$ GAL80                   | $\Delta$ GAL80 harboring plasmid<br>pESC-P <sub>GAL1</sub> -PSG1-LegH                           | This study |

| Strains and plasmids                                     | Description                                                                                         | Source     |
|----------------------------------------------------------|-----------------------------------------------------------------------------------------------------|------------|
| MID2- $\Delta GAL80$                                     | $\Delta GAL80$ harboring plasmid<br>pESC-P <sub>GAL1</sub> -MID2-LegH                               | This study |
| GAS5- $\Delta GAL80$                                     | $\Delta GAL80$ harboring plasmid<br>pESC-P <sub>GAL1</sub> -GAS5-LegH                               | This study |
| FET3- $\Delta GAL80$                                     | $\Delta GAL80$ harboring plasmid<br>pESC-P <sub>GAL1</sub> -FET3-LegH                               | This study |
| CSI2- $\Delta GAL80$                                     | $\Delta GAL80$ harboring plasmid<br>pESC-P <sub>GAL1</sub> -CSI2-LegH                               | This study |
| FLO10- $\Delta GAL80$                                    | $\Delta GAL80$ harboring plasmid<br>pESC-P <sub>GAL1</sub> -FLO10-LegH                              | This study |
| PHO5- $\Delta GAL80$                                     | $\Delta GAL80$ harboring plasmid<br>pESC-P <sub>GAL1</sub> -PHO5-LegH                               | This study |
| PIR1- $\Delta GAL80$                                     | $\Delta GAL80$ harboring plasmid<br>pESC-P <sub>GAL1</sub> -PIR1-LegH                               | This study |
| SWP1- $\Delta GAL80$                                     | $\Delta GAL80$ harboring plasmid<br>pESC-P <sub>GAL1</sub> -SWP1-LegH                               | This study |
| FLO10 $\alpha^{L63S}$ - $\Delta GAL80$                   | $\Delta GAL80$ harboring plasmid<br>pESC-P <sub>GAL1</sub> -FF $\alpha^{L63S}$ -LegH                | This study |
| FLO10( $\Delta 30-43$ )- $\Delta GAL80$                  | $\Delta GAL80$ harboring plasmid<br>pESC-P <sub>GAL1</sub> -FF $\alpha_{\Delta 30-43}$ -LegH        | This study |
| FLO10( $\Delta 30-43$ ) $\alpha^{L63S}$ - $\Delta GAL80$ | $\Delta GAL80$ harboring plasmid<br>pESC-P <sub>GAL1</sub> -FF $\alpha_{\Delta 30-43}^{L63S}$ -LegH | This study |
| $\alpha$ - $\Delta GAL80$ - $\Delta PEP4$                | $\Delta GAL80$ - $\Delta PEP4$ harboring plasmid<br>pESC-P <sub>GAL1</sub> -MF $\alpha$ -LegH       | This study |
| $\alpha$ - $\Delta GAL80$ - $\Delta VPS10$               | $\Delta GAL80$ - $\Delta VPS10$ harboring plasmid<br>pESC-P <sub>GAL1</sub> -MF $\alpha$ -LegH      | This study |
| $\alpha$ - $\Delta GAL80$ - $\Delta MCA1$                | $\Delta GAL80$ - $\Delta MCA1$ harboring plasmid<br>pESC-P <sub>GAL1</sub> -MF $\alpha$ -LegH       | This study |

| Strains and plasmids                                       | Description                                                                                                                                      | Source     |
|------------------------------------------------------------|--------------------------------------------------------------------------------------------------------------------------------------------------|------------|
| $\alpha$ - $\Delta GAL80$ - $\Delta PEP4$ - $\Delta VPS10$ | $\Delta GAL80$ - $\Delta PEP4$ - $\Delta VPS10$ harboring plasmid pESC-P <sub>GAL1</sub> -MF $\alpha$ -LegH                                      | This study |
| FLO10 $\alpha^{L63S}$ - $\Delta GAL80$ - $\Delta PEP4$     | $\Delta GAL80$ - $\Delta PEP4$ harboring plasmid pESC-P <sub>GAL1</sub> -FF $\alpha^{L63S}$ -LegH                                                | This study |
| <b>Plasmids</b>                                            |                                                                                                                                                  |            |
| pESC                                                       | Empty plasmid with bidirectional gene expression cassettes (P <sub>GAL1</sub> -T <sub>CYC1</sub> and P <sub>GAL10</sub> -T <sub>ADH1</sub> , 2u) | Lab stock  |
| pESC-P <sub>GAL1</sub> -LegH                               | pESC inserted with soy leghemoglobin under P <sub>GAL1</sub>                                                                                     | Lab stock  |
| pESC-CRM <sub>GAL1</sub> -CORE <sub>TEF1</sub> -LegH       | pESC inserted with soy leghemoglobin under CRM <sub>GAL1</sub> -P <sub>TEF1</sub>                                                                | This study |
| pESC-CRM <sub>GAL1</sub> -CORE <sub>TDH3</sub> -LegH       | pESC inserted with soy leghemoglobin under CRM <sub>GAL1</sub> -P <sub>TDH3</sub>                                                                | This study |
| pESC-CRM <sub>GAL1</sub> -CORE <sub>GAL7</sub> -LegH       | pESC inserted with soy leghemoglobin under CRM <sub>GAL1</sub> -P <sub>GAL7</sub>                                                                | This study |
| pESC-P <sub>GAL1</sub> -UAS $\times 2$ -LegH               | pESC-P <sub>GAL1</sub> -LegH with two UAS <sub>GAL1</sub>                                                                                        | This study |
| pESC-P <sub>GAL1</sub> -UAS $\times 3$ -LegH               | pESC-P <sub>GAL1</sub> -LegH with three UAS <sub>GAL1</sub>                                                                                      | This study |
| pESC-P <sub>GAL1</sub> -UAS $\times 4$ -LegH               | pESC-P <sub>GAL1</sub> -LegH with four UAS <sub>GAL1</sub>                                                                                       | This study |
| pESC-P <sub>GAL1</sub> -MF $\alpha$ -LegH                  | pESC-P <sub>GAL1</sub> -LegH with pre-pro-MF $\alpha$ leader                                                                                     | Lab stock  |
| pESC-P <sub>GAL1</sub> -MF $\alpha_{\Delta 27-29}$ -LegH   | pESC-P <sub>GAL1</sub> -LegH with pre-pro-MF $\alpha_{\Delta 27-29}$ mutant leader                                                               | This study |
| pESC-P <sub>GAL1</sub> -MF $\alpha_{\Delta 30-43}$ -LegH   | pESC-P <sub>GAL1</sub> -LegH with pre-pro-MF $\alpha_{\Delta 30-43}$ mutant leader                                                               | This study |
| pESC-P <sub>GAL1</sub> -MF $\alpha_{\Delta 43-70}$ -LegH   | pESC-P <sub>GAL1</sub> -LegH with pre-pro-MF $\alpha_{\Delta 43-70}$ mutant leader                                                               | This study |



| Strains and plasmids                                            | Description                                                                               | Source     |
|-----------------------------------------------------------------|-------------------------------------------------------------------------------------------|------------|
| pESC-P <sub>GAL1</sub> -MF $\alpha_{\Delta 55-70}$ -LegH        | pESC-P <sub>GAL1</sub> -LegH with<br>pre-pro-MF $\alpha_{\Delta 55-70}$ mutant leader     | This study |
| pESC-P <sub>GAL1</sub> -MF $\alpha_{\Delta 57-70}$ -LegH        | pESC-P <sub>GAL1</sub> -LegH with<br>pre-pro-MF $\alpha_{\Delta 57-70}$ mutant leader     | This study |
| pESC-P <sub>GAL1</sub> -MF $\alpha_{\Delta 57-60}$ -LegH        | pESC-P <sub>GAL1</sub> -LegH with<br>pre-pro-MF $\alpha_{\Delta 57-60}$ mutant leader     | This study |
| pESC-P <sub>GAL1</sub> -MF $\alpha_{\Delta 79-83}$ -LegH        | pESC-P <sub>GAL1</sub> -LegH with<br>pre-pro-MF $\alpha_{\Delta 79-83}$ mutant leader     | This study |
| pESC-P <sub>GAL1</sub> -MF $\alpha_{(57-60)\times 1}$ -Leg<br>H | pESC-P <sub>GAL1</sub> -LegH with<br>pre-pro-MF $\alpha_{(57-60)\times 1}$ mutant leader  | This study |
| pESC-P <sub>GAL1</sub> -OF $\alpha_{\Delta 27-29}$ -LegH        | pESC-P <sub>GAL1</sub> -LegH with<br>Ost1-pro-MF $\alpha_{\Delta 27-29}$ hybrid leader    | This study |
| pESC-P <sub>GAL1</sub> -OF $\alpha_{\Delta 30-43}$ -LegH        | pESC-P <sub>GAL1</sub> -LegH with<br>Ost1-pro-MF $\alpha_{\Delta 30-43}$ hybrid leader    | This study |
| pESC-P <sub>GAL1</sub> -OF $\alpha_{\Delta 43-70}$ -LegH        | pESC-P <sub>GAL1</sub> -LegH with<br>Ost1-pro-MF $\alpha_{\Delta 43-70}$ hybrid leader    | This study |
| pESC-P <sub>GAL1</sub> -OF $\alpha_{\Delta 55-70}$ -LegH        | pESC-P <sub>GAL1</sub> -LegH with<br>Ost1-pro-MF $\alpha_{\Delta 55-70}$ hybrid leader    | This study |
| pESC-P <sub>GAL1</sub> -OF $\alpha_{\Delta 57-70}$ -LegH        | pESC-P <sub>GAL1</sub> -LegH with<br>Ost1-pro-MF $\alpha_{\Delta 57-70}$ hybrid leader    | This study |
| pESC-P <sub>GAL1</sub> -OF $\alpha_{\Delta 57-60}$ -LegH        | pESC-P <sub>GAL1</sub> -LegH with<br>Ost1-pro-MF $\alpha_{\Delta 57-60}$ hybrid leader    | This study |
| pESC-P <sub>GAL1</sub> -OF $\alpha_{\Delta 79-83}$ -LegH        | pESC-P <sub>GAL1</sub> -LegH with<br>Ost1-pro-MF $\alpha_{\Delta 79-83}$ hybrid leader    | This study |
| pESC-P <sub>GAL1</sub> -OF $\alpha_{(57-60)\times 1}$ -LegH     | pESC-P <sub>GAL1</sub> -LegH with<br>Ost1-pro-MF $\alpha_{(57-60)\times 1}$ hybrid leader | This study |
| pESC-P <sub>GAL1</sub> -MF $\alpha^{V38A}$ -LegH                | pESC-P <sub>GAL1</sub> -LegH with<br>pre-pro-MF $\alpha^{V38A}$ mutant leader             | This study |

| Strains and plasmids                                      | Description                                                                            | Source     |
|-----------------------------------------------------------|----------------------------------------------------------------------------------------|------------|
| pESC-P <sub>GAL1</sub> -MF $\alpha$ <sup>G40D</sup> -LegH | pESC-P <sub>GAL1</sub> -LegH with<br>pre-pro-MF $\alpha$ <sup>G40D</sup> mutant leader | This study |
| pESC-P <sub>GAL1</sub> -MF $\alpha$ <sup>V50A</sup> -LegH | pESC-P <sub>GAL1</sub> -LegH with<br>pre-pro-MF $\alpha$ <sup>V50A</sup> mutant leader | This study |
| pESC-P <sub>GAL1</sub> -MF $\alpha$ <sup>L63S</sup> -LegH | pESC-P <sub>GAL1</sub> -LegH with<br>pre-pro-MF $\alpha$ <sup>L63S</sup> mutant leader | This study |
| pESC-P <sub>GAL1</sub> -MF $\alpha$ <sup>L64S</sup> -LegH | pESC-P <sub>GAL1</sub> -LegH with<br>pre-pro-MF $\alpha$ <sup>L64S</sup> mutant leader | This study |
| pESC-P <sub>GAL1</sub> -MF $\alpha$ <sup>F65S</sup> -LegH | pESC-P <sub>GAL1</sub> -LegH with<br>pre-pro-MF $\alpha$ <sup>F65S</sup> mutant leader | This study |
| pESC-P <sub>GAL1</sub> -MF $\alpha$ <sup>I66T</sup> -LegH | pESC-P <sub>GAL1</sub> -LegH with<br>pre-pro-MF $\alpha$ <sup>I66T</sup> mutant leader | This study |
| pESC-P <sub>GAL1</sub> -CSI2-LegH                         | pESC-P <sub>GAL1</sub> -LegH with<br>CSI2-pro-MF $\alpha$ hybrid leader                | This study |
| pESC-P <sub>GAL1</sub> -FET3-LegH                         | pESC-P <sub>GAL1</sub> -LegH with<br>FET3-pro-MF $\alpha$ hybrid leader                | This study |
| pESC-P <sub>GAL1</sub> -FLO10-LegH                        | pESC-P <sub>GAL1</sub> -LegH with<br>FLO10-pro-MF $\alpha$ hybrid leader               | This study |
| pESC-P <sub>GAL1</sub> -GAS5-LegH                         | pESC-P <sub>GAL1</sub> -LegH with<br>GAS5-pro-MF $\alpha$ hybrid leader                | This study |
| pESC-P <sub>GAL1</sub> -MID2-LegH                         | pESC-P <sub>GAL1</sub> -LegH with<br>MID2-pro-MF $\alpha$ hybrid leader                | This study |
| pESC-P <sub>GAL1</sub> -NCW2-LegH                         | pESC-P <sub>GAL1</sub> -LegH with<br>NCW2-pro-MF $\alpha$ hybrid leader                | This study |
| pESC-P <sub>GAL1</sub> -PHO5-LegH                         | pESC-P <sub>GAL1</sub> -LegH with<br>PHO5-pro-MF $\alpha$ hybrid leader                | This study |
| pESC-P <sub>GAL1</sub> -PIR1-LegH                         | pESC-P <sub>GAL1</sub> -LegH with<br>PIR1-pro-MF $\alpha$ hybrid leader                | This study |

| Strains and plasmids                                                                              | Description                                                                                                                     | Source     |
|---------------------------------------------------------------------------------------------------|---------------------------------------------------------------------------------------------------------------------------------|------------|
| pESC-P <sub>GAL1</sub> -PIR3-LegH                                                                 | pESC-P <sub>GAL1</sub> -LegH with<br>PIR3-pro-MF $\alpha$ hybrid leader                                                         | This study |
| pESC-P <sub>GAL1</sub> -PSG1-LegH                                                                 | pESC-P <sub>GAL1</sub> -LegH with<br>PSG1-pro-MF $\alpha$ hybrid leader                                                         | This study |
| pESC-P <sub>GAL1</sub> -SWP1-LegH                                                                 | pESC-P <sub>GAL1</sub> -LegH with<br>SWP1-pro-MF $\alpha$ hybrid leader                                                         | This study |
| pESC-P <sub>GAL1</sub> -FF $\alpha$ <sup>L63S</sup> -LegH                                         | pESC-P <sub>GAL1</sub> -LegH with<br>FLO10-pro-MF $\alpha$ <sup>L63S</sup> hybrid leader                                        | This study |
| pESC-P <sub>GAL1</sub> -FF $\alpha$ <sub><math>\Delta</math>30-43</sub> -LegH                     | pESC-P <sub>GAL1</sub> -LegH with<br>FLO10-pro-MF $\alpha$ <sub><math>\Delta</math>30-43</sub> hybrid leader                    | This study |
| pESC-P <sub>GAL1</sub> -FF $\alpha$ <sub><math>\Delta</math>30-43</sub> <sup>L63S</sup> -Leg<br>H | pESC-P <sub>GAL1</sub> -LegH with<br>FLO10-pro-MF $\alpha$ <sub><math>\Delta</math>30-43</sub> <sup>L63S</sup> hybrid<br>leader | This study |

**Table S2 Primers used in this study**

| <b>Primer</b>     | <b>Sequence (5'-3')</b>                                        |
|-------------------|----------------------------------------------------------------|
| CRM-TEF1-F        | AAGCATAGCAATCTAATCTAAGTTTGGATCCATGGGTGCT<br>TTTACTGAAAAAC      |
| CRM-TEF1-R        | CGAAGAAAAAGAATAGATCAAAAATCATCGCTTCGCT                          |
| URM-TEF1-F        | GATTTTTGATCTATTCTTTTTCTTCGTCGAAAAAGGCAAT                       |
| URM-TEF1-R        | TAAAAGCACCCATGGATCCAAACTTAGATTAG                               |
| CRM-TDH3-F        | AACACACATAAACAACAAAGGATCCATGGGTGCTTTTAC<br>TGAAAAAC            |
| CRM-TDH3-R        | ATAGAAGGTGTAATAGATCAAAAATCATCGCTTCGCT                          |
| URM-TDH3-F        | GATTTTTGATCTATTACACCTTCTATTACCTTCTGCT                          |
| URM-TDH3-R        | TTCAGTAAAAGCACCCATGGATCCTTTGTTTGTTTATGT                        |
| CRM-GAL7-F        | CAGTTGAATATTCCTCATAAAGGATCCATGGGTGCTTTTAC<br>TGAAAAACAAG       |
| CRM-GAL7-R        | CGACCTGCTTTTATATAGATCAAAAATCATCGCTTCGCT                        |
| URM-GAL7-F        | GATCTATATAAAAGCAGGTCGGAAAT                                     |
| URM-GAL7-R        | CACCCATGGATCCTTTTGAGGGAATATTC                                  |
| UAS-1-F           | CCGCCCTTTAGTGAGGGTTGAATTCAGTACGGATTAGAAG<br>CCGCCGAGCGGGTGACAG |
| UAS-1-R           | CTCGGCGGCTTCTAATCCGCTCGGAGCAGTGCGGCGCGA<br>GGCACATCTGCGTTTC    |
| GAL10-F           | GCTTGTTTCGATAGAAGACAGTAGCTTCATTTTCAAAAATT<br>CTTAC             |
| GAL10-R           | GCGGCTTCTAATCCGTCAATATAGCAATGAGCAGTTAAGC<br>GTATTACT           |
| GAL4p-F           | AGTGAGGGTTGAATTCAGTATTACTCTTTTTTTGGGTTTGG<br>T                 |
| GAL4p-GAL10<br>-R | GTAAGAATTTTTGAAAATGAAGCTACTGTCTTCTATCGAA<br>CAAGCATGCG         |

| Primer       | Sequence (5'-3')                                       |
|--------------|--------------------------------------------------------|
| GAL10-RPCR-F | GCTTAACTGCTCATTGCTATATTGACGGATTAGAAGCCGCC<br>G         |
| GAL4-RPCR-R  | CCAAAAAAGAGTAATACTGAATTCAACCCTCACTAAAG<br>GGCGGCCGCACT |
| TEF1-F       | CGATAGAAGACAGTAGCTTCATTAGTTCTAGAAACTTAG<br>ATTAGATTGC  |
| TEF1-R       | GGCGGCTTCTAATCCGATAGCTTCAAATGTTTCTACTCCT<br>TTTTTACTC  |
| GAL4p-F      | AGTGAGGGTTGAATTCAGTATTACTCTTTTTTTGGGTTTGG<br>T         |
| GAL4p-TEF1-R | CTAAGTTTTCTAGAACTAATGAAGCTACTGTCTTCTATCG               |
| TEF1-RPCR-F  | GGAGTAGAAACATTTTGAAGCTATCGGATTAGAAGCCGCC<br>GAGC       |
| GAL4-RPCR-R  | CCAAAAAAGAGTAATACTGAATTCAACCCTCACTAAAG<br>GGCGGCCGCACT |
| 2729-F       | TTGTGCCGTTGTTGTAGTGTTGACTGGAGC                         |
| 2729-R       | ACTACAACAACGGCACAAATTCCGGCTGAAGCT                      |
| 3043-F       | CCCCTTCTAATTCATCTTCTGTTGTAGTGTTGACT                    |
| 3043-R       | AGAAGATGAATTAGAAGGGGATTCGATGTTGCT                      |
| 4370-F       | AATGCTGGCATCTAAGTAACCGATGACAGCTTCAG                    |
| 4370-R       | TACTTAGATGCCAGCATTGCTGCTAAAG                           |
| 5570-F       | AATGCTGGCTGGCAAAACAGCAACATCGAAAT                       |
| 5570-R       | GTTTTGCCAGCCAGCATTGCTGCTAAAG                           |
| 5770-F       | AATGCTGGCGGAAAATGGCAAAACAGCAACAT                       |
| 5770-R       | CCATTTTCCGCCAGCATTGCTGCTAAAG                           |
| 5760-F       | ATAACCCGTTGGAAAATGGCAAAACAGCAACAT                      |
| 5760-R       | CATTTTCCAACGGGTTATTGTTTATAAATACTACT                    |

| Primer       | Sequence (5'-3')                                               |
|--------------|----------------------------------------------------------------|
| 7983-F       | GCCTCTCTTTTTTCTTCTTTAGCAGCAATGCT                               |
| 7983-R       | CTAAAGAAGAAAAAAGAGAGGCTGAAGCTCAATTAAC                          |
| (57-60) ×1-F | AATAACCCGTTATTTGTGCTGTTATTTGTGCTGTTGGAAAA<br>TGGCAAAACAGCAACAT |
| (57-60) ×1-R | AGCACAAATAACGGGTTATTATTGTTTAT                                  |
| Ost1-F-2     | TGTTTTTTCAACGTGTCTTCTGCTGCTCCAGTCAACACTA<br>CAACAGAAG          |
| Ost1-R-1     | GTTGTAGTGTGACTGGAGCAGCAGAAGACACGTTGAAA<br>AAAC                 |
| 1-F          | CCCGAAAAGTGCCACCTGAACGAAGCATCTGTGCTTCATT<br>TTGT               |
| 2-R          | TTCG TTCAGGTGGCACTTTTCGGGGAAATGT                               |
| α-V38A-F     | TTCCGGCTGAAGCTGCTATCGGTTAC                                     |
| α-V38A-R     | GTAACCGATAGCAGCTTCAGCCGGAATTTGTGCC                             |
| α-G40D-F     | GAAGCTGTCATCGATTACTCAGATTTAG                                   |
| α-G40D-R     | CTAAATCTGAGTAATCGATGACAGCTTCAGCCGGAATTTG<br>TG                 |
| α-V50A-F     | GATTTGATGCTGCTGTTTTGCCATTTTC                                   |
| α-V50A-R     | GAAAATGGCAAAACAGCAGCATCGAAATCCCCTTCTAAAT<br>C                  |
| α-L63S-F     | CACAAATAACGGGTCTTTGTTTATAAATAC                                 |
| α-L63S-R     | GTATTTATAAACAAGACCCGTTATTTGTGCTGTTGGAAAA<br>TG                 |
| α-L64S-F     | CAGCACAAATAACGGGTTATCTTTTATAAATAC                              |
| α-L64S-R     | GTATTTATAAAAGATAACCCGTTATTTGTGCTGTTGGAAAA<br>TG                |
| α-F65S-F     | CACAAATAACGGGTTATTGTCTATAAATACTAC                              |
| α-F65S-R     | GTAGTATTTATAGACAATAACCCGTTATTTGTGCTGTTGG                       |

| Primer           | Sequence (5'-3')                                                                  |
|------------------|-----------------------------------------------------------------------------------|
| $\alpha$ -I66T-F | GTTATTGTTTACTAATACTACTATTGCCAGC                                                   |
| $\alpha$ -I66T-R | GCTGGCAATAGTAGTATTAGTAAACAATAACCCGTTATTTG<br>TGCTG                                |
| PIR3-F           | ATTAGTCGTCTCCGCTTTAGCTGCTACATCTTTAGCTGCTC<br>CAGTCAACACTACAACAG                   |
| PIR3-R           | TAAAGCGGAGACGACTAATGGCTTTTTATATTGCATGGATC<br>CGTTTTTTCTCCTTGACG                   |
| NCW2-F           | TATTATTTACCACCTTAATTACTCTAGCCGCTGCTGCTCCA<br>GTCAACACTACAACAG                     |
| NCW2-R           | TTAAGGTGGTAAATAATATGGAACAGGCCTTCATGGATCC<br>GTTTTTTCTCCTTGACG                     |
| PSG1-F           | CTTTTCTTTGGCATCGCTTTATCAACATGTTTCATGGTGCTC<br>CAGTCAACACTACAACAG                  |
| PSG1-R           | AGCGATGCCAAAGAAAAGAAGATAAGTATACTATCGTGAA<br>ATCTCATGGATCCGTTTTTTCTCCTTGACG        |
| MID2-F           | TTACTTTTAATACTGTCATGCATATCGACGATACGCGCAGC<br>TCCAGTCAACACTACAACAG                 |
| MID2-R           | GCATGACAGTATTAAGTAATAAGCGGAACTATTCTTG<br>GTTGTGAAAGACAACATGGATCCGTTTTTTCTCCTTGACG |
| GAS5-F           | ACAAGTGCCTTCGTTTTAAGTGCTGGTTTGGCTCAGGCTG<br>CTCCAGTCAACACTACAACAG                 |
| GAS5-R           | TAAAACGAAGGCACTTGTAAGAGAACGTAGTAACATGGA<br>TCCGTTTTTTCTCCTTGACG                   |
| FET3-F           | AGCCGTTTTGCTTTTCTCGATGCTCTCGCTAGCACAAGCG<br>GCTCCAGTCAACACTACAACAG                |
| FET3-R           | GAAAAGCAAAACGGCTATAGAGAGCAAAGCGTTAGTCAT<br>GGATCCGTTTTTTCTCCTTGACG                |
| CSI2-F           | GATACTACTATTTCATTTGTTTGCTCTACAAGAATTTCAAC                                         |

| Primer  | Sequence (5'-3')                                                                |
|---------|---------------------------------------------------------------------------------|
|         | TTGTCTCCGCTGCTCCAGTCAACACTACAACAG                                               |
| CSI2-R  | CAAATGAAGTAGTAGTATCACTTTCCAAATGGAGATTCT<br>GGCAGTCTCATGGATCCGTTTTTTCTCCTTGACG   |
| FLO10-F | TTTGACCGGCCTATTTTTGCTATCTGTAGCTAATGTTGCTCT<br>AGGTGCTCCAGTCAACACTACAACAG        |
| FLO10-R | CAAAAATAGGCCGGTCAAAAATATATATCGAGCAGCCACA<br>GGCATGGATCCGTTTTTTCTCCTTGACG        |
| PHO5-F  | TGTTTATTCAATTTTAGCCGCTTCTTTGGCCAATGCAGCTC<br>CAGTCAACACTACAACAG                 |
| PHO5-R  | AGCGGCTAAAATTGAATAAACAGATTAAACATGGAT<br>CCGTTTTTTCTCCTTGACG                     |
| PIR1-F  | ATTAGTTGCCTCCGCCTTAGTTGCTACATCTTTAGCTGCTC<br>CAGTCAACACTACAACAG                 |
| PIR1-R  | AAGGCGGAGGCAACTAATGATTTTTTGTATTGCATGGATC<br>CGTTTTTTCTCCTTGACG                  |
| SWP1-F  | TTCAAACACTTGCGGCCTTGGTGTCGTGCATATCGTTTCG<br>TCCTCGCTGCTCCAGTCAACACTACAACAGAAGAT |
| SWP1-R  | ATGCACGACACCAAGGCCGCAAGTGTTTTGAAGAATTGC<br>ATGGATCCGTTTTTTCTCCTTGACGTTAAAGTAT   |



Table S3 Elements of the promoters used in this study

| Elements of the promoters | Sequence (5'-3')                                                                                                                                                                                                                                                                                                                           |
|---------------------------|--------------------------------------------------------------------------------------------------------------------------------------------------------------------------------------------------------------------------------------------------------------------------------------------------------------------------------------------|
| CRM <sub>GAL1</sub>       | AGTACGGATTAGAAGCCGCCGAGCGGGTGACAGCCCTCCG<br>AAGGAAGACTCTCCTCCGTGCGTCCTCGTCTTCACCGGTC<br>GCGTTCCTGAAACGCAGATGTGCCTCGCGCCGCACTGCTC<br>CGAACAATAAAGATTCTACAATACTAGCTTTTATGGTTATGA<br>AGAGGAAAAATTGGCAGTAACCTGGCCCCACAAACCTTCA<br>AATGAACGAATCAAATTAACAACCATAGGATGATAATGCGA<br>TTAGTTTTTTAGCCTTATTTCTGGGGTAATTAATCAGCGAAG<br>CGATGATTTTTGATCTA |
| CORE <sub>TEF1</sub>      | TTCTTTTTCTTCGTCGAAAAAGGCAATAAAAATTTTTATCA<br>CGTTTCTTTTTCTTGAAAATTTTTTTTTTTGATTTTTTTCTCTT<br>TCGATGACCTCCCATTTGATATTTAAGTTAATAAACGGTCTTC<br>AATTTCTCAAGTTTCAGTTTCATTTTTCTTGTTCTATTACAA<br>CTTTTTTTACTTCTTGCTCATTAGAAAGAAAGCATAGCAAT<br>CTAATCTAAGTTT                                                                                       |
| CORE <sub>TDH3</sub>      | TTACACCTTCTATTACCTTCTGCTCTCTCTGATTTGGAAAAA<br>GCTGAAAAAAAAGGTTGAAACCAGTTCCTGAAATTATTC<br>CCCTACTTGACTAATAAGTATATAAAGACGGTAGGTATTGAT<br>TGTAATTCTGTAAATCTATTTCTTAAACTTCTTAAATTCTACT<br>TTTATAGTTAGTCTTTTTTTTTAGTTTTTAAACACCAAGAACT<br>TAGTTTCGAATAAACACACATAAACAAACAAA                                                                      |
| CORE <sub>GAL7</sub>      | TATAAAAGCAGGTCGGAAATATTTATGGGCATTATTATGCAG<br>AGCATCAACATGATAAAAAAAAACAGTTGAATATTCCCTC<br>AAAA                                                                                                                                                                                                                                             |
| UAS <sub>GAL1</sub>       | CGGATTAGAAGCCGCCGAGCGGGTGACAGCCCTCCGAAG<br>GAAGACTCTCCTCCGTGCGTCCTCGTCTTCACCGGTCGCG<br>TTCCTGAAACGCAGATGTGCCTCGCGCCGCACTGCTCCG                                                                                                                                                                                                             |

**Table S4 Hybrid signal peptides used in this study**

| Signal peptides | Sequence (5'-3')                                                                                                                                                                                                                                                                                     |
|-----------------|------------------------------------------------------------------------------------------------------------------------------------------------------------------------------------------------------------------------------------------------------------------------------------------------------|
| MF $\alpha$     | ATGAGATTTCTTCAATTTTACTGCAGTTTATTCGC<br>AGCATCCTCCGCATTAGCTGCTCCAGTCAACACTACA<br>ACAGAAGATGAAACGGCACAATTCCGGCTGAAGC<br>TGTCATCGGTTACTCAGATTTAGAAGGGGATTTTCGAT<br>GTTGCTGTTTTGCCATTTTCCAACAGCACAAATAACG<br>GGTTATTGTTTATAAATACTACTATTGCCAGCATTGCT<br>GCTAAAGAAGAAGGGGTATCTCTCGAGAAAAGAGA<br>GGCTGAAGCT |
| pro-MF $\alpha$ | GCTCCAGTCAACACTACAACAGAAGATGAAACGGC<br>ACAAATTCCGGCTGAAGCTGTCATCGGTTACTCAGAT<br>TTAGAAGGGGATTTTCGATGTTGCTGTTTTGCCATTTT<br>CCAACAGCACAAATAACGGGTATTGTTTATAAATAC<br>TACTATTGCCAGCATTGCTGCTAAAGAAGAAGGGGT<br>ATCTCTCGAGAAAAGAGAGGGCTGAAGCT                                                              |
| pre-Ost1        | AGGCAGGTTTGGTTCTCTTGGATTGTGGGATTGTTCC<br>TATGTTTTTTCAACGTGTCTTCTGCT                                                                                                                                                                                                                                  |
| pre-PIR3        | ATGCAATATAAAAAGCCATTAGTCGTCTCCGCTTTAG<br>CTGCTACATCTTTAGCT                                                                                                                                                                                                                                           |
| pre-NCW2        | ATGAAGGCCTGTTCCATATTATTTACCACCTTAATTAC<br>TCTAGCCGCTGCT                                                                                                                                                                                                                                              |
| pre-PSG1        | ATGAGATTTACGATAGTATACTTATCTTCTTTTCTTT<br>GGCATCGCTTTATCAACATGTTTCATGGT                                                                                                                                                                                                                               |
| pre-MID2        | ATGTTGTCTTTCACAACCAAGAATAGTTTCCGCTTAT<br>TACTTTTAATACTGTCATGCATATCGACGATACGCGCA                                                                                                                                                                                                                      |
| pre-GAS5        | ATGTTACTACGTTCTCTTACAAGTGCCTTCGTTTTAA<br>GTGCTGGTTTGGCTCAGGCT                                                                                                                                                                                                                                        |
| pre-FET3        | ATGACTAACGCTTTGCTCTCTATAGCCGTTTTGCTTTT                                                                                                                                                                                                                                                               |

| Signal peptides | Sequence (5'-3')                                                             |
|-----------------|------------------------------------------------------------------------------|
|                 | CTCGATGCTCTCGCTAGCACAAGCG                                                    |
|                 | ATGAGACTGCCAGAAATCTCCATTTGGAAAGTGATA                                         |
| pre-CSI2        | CTACTACTTCATTTGTTTGCTCTACAAGAATTTCAACT<br>TGTCTCCGCT                         |
| pre-FLO10       | ATGCCTGTGGCTGCTCGATATATATTTTTGACCGGCCT<br>ATTTTTGCTATCTGTAGCTAATGTTGCTCTAGGT |
| pre-PHO5        | ATGTTTAAATCTGTTGTTTATTCAATTTTAGCCGCTTC<br>TTTGGCCAATGCA                      |
| pre-PIR1        | ATGCAATACAAAAAATCATTAGTTGCCTCCGCCTTAG<br>TTGCTACATCTTTAGCT                   |
| pre-SWP1        | ATGCAATTCTTCAAAACACTTGCGGCCTTGGTGTCGT<br>GCATATCGTTCGTCCTCGCT                |
